# Supplementary material for: Lack of Association Between 25(OH)D Levels and Incident Type 2 Diabetes in Older Women
Source: PubMed Central journal article supplement — Diabetes Care. 2011 Feb 17;34(3):628–34. doi: 10.2337/dc10-1632 (PMC3041195; doi:10.2337/dc10-1632), 2011-02-17
Supplement: supp_dc10-1632v101632_DC101632SupplementaryData.pdf [file supp_dc10-1632v101632_DC101632SupplementaryData.pdf]

SUPPLEMENTARY DATA

**Supplementary Table 1. Sources of case-control study participants by incident diabetes status**

|                                                                      | Fracture study |              | Fracture/Colorectal cancer study |               | Breast cancer study |              | Total           |               |
|----------------------------------------------------------------------|----------------|--------------|----------------------------------|---------------|---------------------|--------------|-----------------|---------------|
| WHI study                                                            | OS             |              | CaD trial                        |               | CaD trial           |              |                 |               |
|                                                                      | No DM          | DM           | No DM                            | DM            | No DM               | DM           | No DM           | DM            |
| Unique Cases                                                         | 318<br>(94.1%) | 20<br>(5.9%) | 1485<br>(93.7%)                  | 100<br>(6.3%) | 814<br>(93.5%)      | 57<br>(6.5%) | 2617<br>(93.7%) | 177<br>(6.3%) |
| Unique Controls                                                      | 340<br>(95.0%) | 18<br>(5.0%) | 802<br>(93.1%)                   | 59<br>(6.9%)  | 239<br>(93.4%)      | 17<br>(6.6%) | 1381<br>(93.6%) | 94<br>(6.4%)  |
| Total                                                                |                |              |                                  |               |                     |              | 3998<br>(93.7%) | 271<br>(6.3%) |
| <b>CaD study Overlap</b>                                             |                |              |                                  |               |                     |              |                 |               |
| Control in both Fracture/Colorectal cancer and Breast cancer studies |                |              |                                  |               |                     |              | 722<br>(95.3%)  | 36<br>(4.7%)  |
| Fracture/Colorectal cancer case and Breast cancer control            |                |              |                                  |               |                     |              | 1<br>(100%)     | 0             |
| Fracture/Colorectal cancer control and Breast cancer case            |                |              |                                  |               |                     |              | 47<br>(87.0%)   | 7<br>(13.0%)  |
| Case in both Fracture/Colorectal cancer and Breast cancer studies    |                |              |                                  |               |                     |              | 55<br>(94.8%)   | 3<br>(5.2%)   |
| <b>Total Participants</b>                                            |                |              |                                  |               |                     |              | 4823<br>(93.8%) | 317<br>(6.2%) |

SUPPLEMENTARY DATA

**Supplementary Table 2. Backwards regression model for variable selection in Model 3**

| Variable Removed    | Removal p-value | 25(OH)D Odds Ratio |        |
|---------------------|-----------------|--------------------|--------|
|                     |                 | 50-<75             | >=75   |
| Full Model          | N/A             | 0.7935             | 1.0554 |
| Langleys*           | 0.1901          | 0.8077             | 1.0746 |
| Protein             | 0.8949          | 0.8075             | 1.0735 |
| Fruits/Veggies      | 0.8393          | 0.8068             | 1.0734 |
| Calcium             | 0.7530          | 0.8094             | 1.0772 |
| Smoking             | 0.7316          | 0.8056             | 1.0727 |
| Hx of Premature MI  | 0.6410          | 0.8062             | 1.0720 |
| Fat                 | 0.5817          | 0.8055             | 1.0766 |
| Alcohol             | 0.5749          | 0.8107             | 1.0770 |
| CVD                 | 0.3829          | 0.8161             | 1.0823 |
| Education           | 0.3293          | 0.8181             | 1.1029 |
| Total Glycemic Load | 0.2931          | 0.8127             | 1.0857 |
| Multivitamin Use    | 0.2942          | 0.8418             | 1.1304 |
| Hx of skin cancer   | 0.2388          | 0.8383             | 1.1167 |
| Hormone therapy use | 0.1831          | 0.8363             | 1.1168 |
| Waist Circumference | 0.1465          | 0.8221             | 1.0879 |
| Physical Activity   | 0.1458          | 0.8009             | 1.0341 |

\*Langleys were targeted for first removal for confounding with latitude

Variables forced in the model: age, ethnicity, latitude of WHI clinical center, season of blood draw, HT/DM/CaD arm, case-control status

Remaining variables in parsimonious model: BMI (p<.0001), hypertension (p=.003), fiber (p=0.010), magnesium (p=0.0235)

**Supplementary Table 3. Odd ratios for the association of 25(OH)D and incident diabetes for control, unweighted, and weighted samples**

| 25(OH)D                      | <50 nmol/L | 50-<75 nmol/L |              | ≥ 75 nmol/L |              |
|------------------------------|------------|---------------|--------------|-------------|--------------|
|                              |            | OR            | CI           | OR          | CI           |
| Controls Only                | Reference  | 0.89          | (0.58, 1.38) | 1.38        | (0.79, 2.42) |
| All Participants, Unweighted | Reference  | 0.86          | (0.65, 1.13) | 0.99        | (0.68, 1.45) |
| All Participants, Weighted   | Reference  | 0.89          | (0.61, 1.30) | 1.14        | (0.68, 1.90) |

Model adjusted for age, ethnicity, latitude of clinical center, month of blood draw, WHI study indicators, BMI, hypertension, fiber intake, and magnesium intake
